# Supplementary material for: Global, regional, and national prevalence and disability-adjusted life-years for infertility in 195 countries and territories, 1990–2017: results from a global burden of disease study, 2017
Source: PubMed Central journal article supplement (PMC6932903; doi:10.18632/aging.102497), 2019-12-02
Supplement: aging-11-102497-s003..pdf [file aging-11-102497-s003..pdf]

## SUPPLEMENTARY TABLE

**Supplementary Table 1. Trends in infertility age-standardized prevalence by sociodemographic index and region from 1990-2017.**

| Characteristics              | female              |      |                      |                    |                    |        | male                |      |                      |                    |                    |        |        |        |    |   |
|------------------------------|---------------------|------|----------------------|--------------------|--------------------|--------|---------------------|------|----------------------|--------------------|--------------------|--------|--------|--------|----|---|
|                              | PC <sup>a</sup> (%) |      | APC <sup>b</sup> (%) |                    |                    |        | PC <sup>a</sup> (%) |      | APC <sup>b</sup> (%) |                    |                    |        |        |        |    |   |
|                              | Value               | Rank | Value                | 95%CI <sup>c</sup> | 95%CI <sup>c</sup> | Rank   | Value               | Rank | Value                | 95%CI <sup>c</sup> | 95%CI <sup>c</sup> | Rank   |        |        |    |   |
| Global                       | 14.962              |      | 0.370                | 0.213              | 0.527              |        | 8.224               |      | ↑                    | 0.291              | 0.241              | 0.341  |        |        |    |   |
| Sociodemographic index       |                     |      |                      |                    |                    |        |                     |      |                      |                    |                    |        |        |        |    |   |
| Low                          | 5.818               | 5    | ↑                    | 0.274              | -0.052             | 0.601  | 2                   | ↑    | 9.893                | 2                  | ↑                  | 0.385  | 0.204  | 0.566  | 1  | ↑ |
| Low-middle                   | 9.856               | 2    | ↑                    | 0.093              | -0.221             | 0.408  | 5                   | ↑    | 10.907               | 1                  | ↑                  | 0.177  | -0.035 | 0.390  | 4  | ↑ |
| Middle                       | 9.529               | 3    | ↑                    | 0.217              | 0.109              | 0.325  | 3                   | ↑    | 4.936                | 3                  | ↑                  | 0.208  | 0.167  | 0.248  | 3  | ↑ |
| High-Middle                  | 6.205               | 4    | ↑                    | 0.140              | 0.091              | 0.188  | 4                   | ↑    | -2.395               | 1                  | ↓                  | 0.155  | 0.049  | 0.261  | 5  | ↑ |
| High                         | 25.152              | 1    | ↑                    | 0.766              | 0.591              | 0.942  | 1                   | ↑    | 3.241                | 4                  | ↑                  | 0.216  | 0.156  | 0.277  | 2  | ↑ |
| Region                       |                     |      |                      |                    |                    |        |                     |      |                      |                    |                    |        |        |        |    |   |
| Central Asia                 | 5.086               | 10   | ↑                    | 0.170              | -0.052             | 0.393  | 11                  | ↑    | -4.120               | 2                  | ↓                  | 0.174  | 0.062  | 0.287  | 12 | ↑ |
| East Asia                    | 5.005               | 11   | ↑                    | 0.058              | -0.010             | 0.126  | 14                  | ↑    | -2.545               | 5                  | ↓                  | 0.058  | -0.033 | 0.150  | 16 | ↑ |
| High-income Asia Pacific     | 2.924               | 12   | ↑                    | -0.096             | -0.298             | 0.106  | 7                   | ↓    | -3.870               | 3                  | ↓                  | 0.078  | -0.060 | 0.216  | 13 | ↑ |
| South Asia                   | 16.179              | 5    | ↑                    | 0.538              | 0.208              | 0.869  | 8                   | ↑    | 10.525               | 4                  | ↑                  | 0.313  | 0.120  | 0.506  | 8  | ↑ |
| Southeast Asia               | 32.009              | 2    | ↑                    | 0.965              | 0.603              | 1.329  | 4                   | ↑    | 20.804               | 2                  | ↑                  | 0.660  | 0.412  | 0.909  | 3  | ↑ |
| Central Europe               | 23.733              | 4    | ↑                    | 0.591              | 0.420              | 0.763  | 5                   | ↑    | -4.908               | 1                  | ↓                  | 0.217  | 0.023  | 0.412  | 11 | ↑ |
| Eastern Europe               | 7.320               | 8    | ↑                    | 0.138              | -0.012             | 0.289  | 12                  | ↑    | -3.430               | 4                  | ↓                  | 0.230  | 0.104  | 0.356  | 10 | ↑ |
| Western Europe               | 10.458              | 7    | ↑                    | 0.324              | 0.199              | 0.449  | 9                   | ↑    | 5.118                | 8                  | ↑                  | 0.314  | 0.201  | 0.427  | 7  | ↑ |
| Andean Latin America         | -7.515              | 3    | ↓                    | 2.129              | 0.955              | 3.317  | 1                   | ↑    | 20.128               | 3                  | ↑                  | 1.558  | 1.203  | 1.913  | 1  | ↑ |
| Central Latin America        | 44.729              | 1    | ↑                    | 0.573              | 0.365              | 0.781  | 7                   | ↑    | 28.420               | 1                  | ↑                  | 0.578  | 0.410  | 0.747  | 5  | ↑ |
| Southern Latin America       | -15.196             | 1    | ↓                    | -0.723             | -0.880             | -0.565 | 2                   | ↓    | 0.449                | 11                 | ↑                  | 0.058  | 0.042  | 0.075  | 15 | ↑ |
| Tropical Latin America       | 13.300              | 6    | ↑                    | 1.504              | 0.928              | 2.083  | 2                   | ↑    | 9.509                | 5                  | ↑                  | 0.926  | 0.654  | 1.199  | 2  | ↑ |
| High income North America    | 6.195               | 9    | ↑                    | -0.730             | -1.801             | 0.354  | 1                   | ↓    | 0.521                | 10                 | ↑                  | -0.347 | -0.563 | -0.130 | 1  | ↓ |
| Central Sub-Saharan Africa   | -2.351              | 5    | ↓                    | 0.585              | -0.012             | 1.187  | 6                   | ↑    | 2.270                | 9                  | ↑                  | 0.539  | 0.143  | 0.937  | 6  | ↑ |
| Eastern Sub-Saharan Africa   | -0.756              | 7    | ↓                    | -0.395             | -0.927             | 0.139  | 4                   | ↓    | -1.539               | 8                  | ↓                  | -0.307 | -0.608 | -0.005 | 2  | ↓ |
| Southern Sub-Saharan Africa  | -0.994              | 6    | ↓                    | 0.262              | -0.013             | 0.538  | 10                  | ↑    | -0.613               | 9                  | ↓                  | 0.267  | 0.096  | 0.439  | 9  | ↑ |
| Western Sub-Saharan Africa   | 1.388               | 13   | ↑                    | -0.662             | -1.182             | -0.140 | 3                   | ↓    | 5.206                | 7                  | ↑                  | -0.304 | -0.639 | 0.033  | 3  | ↓ |
| North Africa and Middle East | 30.368              | 3    | ↑                    | 1.352              | 1.113              | 1.592  | 3                   | ↑    | 9.027                | 6                  | ↑                  | 0.601  | 0.478  | 0.723  | 4  | ↑ |
| Oceania                      | -11.370             | 2    | ↓                    | -0.222             | -0.361             | -0.084 | 6                   | ↓    | 0.024                | 12                 | ↑                  | -0.003 | -0.015 | 0.010  | 5  | ↓ |
| Australasia                  | 0.949               | 14   | ↑                    | 0.080              | 0.009              | 0.151  | 13                  | ↑    | -2.232               | 7                  | ↓                  | 0.060  | -0.033 | 0.154  | 14 | ↑ |
| Caribbean                    | -4.943              | 4    | ↓                    | -0.239             | -0.306             | -0.171 | 5                   | ↓    | -2.518               | 6                  | ↓                  | -0.111 | -0.147 | -0.074 | 4  | ↓ |

a: percent change.

b: annual percent change

c: confidence interval

**Supplementary Table 2. The relative contributions of each geographical locations in trends of infertility prevalence from 1990-2017.**

| Characteristics              | female                |                       | Male             |                  |
|------------------------------|-----------------------|-----------------------|------------------|------------------|
|                              | Increasing trend      | Decreasing trend      | Increasing trend | Decreasing trend |
|                              | Contribution rate (%) | Contribution rate (%) |                  |                  |
| Sociodemographic index       |                       |                       |                  |                  |
| Low                          | 18.37                 |                       | 33.75            |                  |
| Low-middle                   | 6.26                  |                       | 15.52            |                  |
| Middle                       | 14.58                 |                       | 18.20            |                  |
| Middle-High                  | 9.39                  |                       | 13.60            |                  |
| High                         | 51.41                 |                       | 18.93            |                  |
| Region                       | -                     |                       |                  |                  |
| Central Asia                 | 1.84                  |                       | 2.63             |                  |
| Eastern Asia                 | 0.63                  |                       | 0.88             |                  |
| High-income Asia Pacific     |                       | 3.13                  | 1.17             |                  |
| South Asia                   | 5.80                  |                       | 4.72             |                  |
| Southeast Asia               | 10.41                 |                       | 9.95             |                  |
| Central Europe               | 6.38                  |                       | 3.28             |                  |
| Eastern Europe               | 1.49                  |                       | 3.47             |                  |
| Western Europe               | 3.49                  |                       | 4.74             |                  |
| Andean Latin America         | 22.97                 |                       | 23.48            |                  |
| Central Latin America        | 6.18                  |                       | 8.72             |                  |
| Southern Latin America       |                       | 23.56                 | 0.88             |                  |
| Tropical Latin America       | 16.22                 |                       | 13.96            |                  |
| North America                |                       | 23.79                 |                  | 32.40            |
| Central Sub-Saharan Africa   | 6.31                  |                       | 8.13             |                  |
| Eastern Sub-Saharan Africa   |                       | 12.89                 |                  | 28.67            |
| Southern Sub-Saharan Africa  | 2.83                  |                       | 4.03             |                  |
| Western Sub-Saharan Africa   |                       | 21.60                 |                  | 28.37            |
| North Africa and Middle East | 14.59                 |                       | 9.05             |                  |
| Oceania                      |                       | 7.25                  |                  | 0.24             |
| Australasia                  | 0.86                  |                       | 0.91             |                  |
| Caribbean                    |                       | 7.78                  |                  | 10.33            |

Please browse Full Text version to see the data of Supplementary Table 3.

**Supplementary Table 3. Trends in infertility age-standardized prevalence rate of 195 countries and territories from 1990-2017.**

**Supplementary Table 4. Trends in infertility age-standardized DALYs by sociodemographic index and region from 1990-2017.**

| Characteristics              | female              |      |                      |                    |                     |      | male                 |      |        |                    |                    |      |
|------------------------------|---------------------|------|----------------------|--------------------|---------------------|------|----------------------|------|--------|--------------------|--------------------|------|
|                              | PC <sup>a</sup> (%) |      | APC <sup>b</sup> (%) |                    | PC <sup>a</sup> (%) |      | APC <sup>b</sup> (%) |      |        |                    |                    |      |
|                              | Value               | Rank | Value                | 95%CI <sup>c</sup> | 95%CI <sup>c</sup>  | Rank | Value                | Rank | Value  | 95%CI <sup>c</sup> | 95%CI <sup>c</sup> | Rank |
| Global                       | 15.834              |      | 0.396                | 0.239              | 0.552               |      | 8.843                | ↑    | 0.293  | 0.237              | 0.349              |      |
| Sociodemographic index       |                     |      |                      |                    |                     |      |                      |      |        |                    |                    |      |
| Low                          | 6.196               | 5 ↑  | 0.279                | -0.040             | 0.598               | 2 ↑  | 9.205                | 2 ↑  | 0.345  | 0.169              | 0.522              | 1 ↑  |
| Low-middle                   | 10.208              | 3 ↑  | 0.117                | -0.190             | 0.424               | 5 ↑  | 10.574               | 1 ↑  | 0.172  | -0.036             | 0.381              | 4 ↑  |
| Middle                       | 10.591              | 2 ↑  | 0.245                | 0.139              | 0.350               | 3 ↑  | 6.118                | 3 ↑  | 0.226  | 0.192              | 0.260              | 2 ↑  |
| High-Middle                  | 6.919               | 4 ↑  | 0.167                | 0.119              | 0.215               | 4 ↑  | -0.970               | 1 ↓  | 0.175  | 0.084              | 0.266              | 3 ↑  |
| High                         | 23.560              | 1 ↑  | 0.714                | 0.542              | 0.888               | 1 ↑  | 2.991                | 4 ↑  | 0.166  | 0.120              | 0.211              | 5 ↑  |
| Region                       |                     |      |                      |                    |                     |      |                      |      |        |                    |                    |      |
| Central Asia                 | 4.768               | 11 ↑ | 0.165                | -0.048             | 0.378               | 11 ↑ | -3.686               | 3 ↓  | 0.153  | 0.053              | 0.253              | 12 ↑ |
| East Asia                    | 5.714               | 9 ↑  | 0.076                | 0.011              | 0.141               | 13 ↑ | -1.584               | 6 ↓  | 0.063  | -0.023             | 0.149              | 13 ↑ |
| High-income Asia Pacific     | 2.583               | 12 ↑ | -0.103               | -0.300             | 0.094               | 7 ↓  | -3.910               | 2 ↓  | 0.050  | -0.070             | 0.170              | 15 ↑ |
| South Asia                   | 16.036              | 5 ↑  | 0.512                | 0.195              | 0.829               | 8 ↑  | 10.057               | 4 ↑  | 0.275  | 0.087              | 0.463              | 8 ↑  |
| Southeast Asia               | 29.602              | 2 ↑  | 0.873                | 0.540              | 1.208               | 4 ↑  | 17.639               | 3 ↑  | 0.524  | 0.308              | 0.742              | 6 ↑  |
| Central Europe               | 22.728              | 4 ↑  | 0.566                | 0.402              | 0.729               | 7 ↑  | -4.065               | 1 ↓  | 0.201  | 0.029              | 0.374              | 11 ↑ |
| Eastern Europe               | 6.717               | 8 ↑  | 0.134                | -0.008             | 0.276               | 12 ↑ | -2.646               | 5 ↓  | 0.205  | 0.100              | 0.310              | 10 ↑ |
| Western Europe               | 10.123              | 7 ↑  | 0.322                | 0.201              | 0.443               | 9 ↑  | 5.270                | 7 ↑  | 0.298  | 0.198              | 0.398              | 7 ↑  |
| Andean Latin America         | -5.284              | 3 ↓  | 2.200                | 1.039              | 3.375               | 1 ↑  | 19.162               | 2 ↑  | 1.436  | 1.116              | 1.757              | 1 ↑  |
| Central Latin America        | 44.105              | 1 ↑  | 0.574                | 0.369              | 0.779               | 6 ↑  | 26.378               | 1 ↑  | 0.543  | 0.388              | 0.697              | 3 ↑  |
| Southern Latin America       | -14.713             | 1 ↓  | -0.694               | -0.844             | -0.543              | 2 ↓  | 0.464                | 11 ↑ | 0.048  | 0.035              | 0.062              | 16 ↑ |
| Tropical Latin America       | 11.425              | 6 ↑  | 1.487                | 0.896              | 2.081               | 2 ↑  | 7.382                | 6 ↑  | 0.871  | 0.596              | 1.147              | 2 ↑  |
| High income North America    | 5.578               | 10 ↑ | -0.751               | -1.814             | 0.324               | 1 ↓  | 0.597                | 10 ↑ | -0.373 | -0.613             | -0.132             | 1 ↓  |
| Central Sub-Saharan Africa   | -1.438              | 5 ↓  | 0.619                | 0.027              | 1.213               | 5 ↑  | 2.349                | 9 ↑  | 0.542  | 0.158              | 0.927              | 4 ↑  |
| Eastern Sub-Saharan Africa   | 0.038               | 15 ↑ | -0.357               | -0.875             | 0.164               | 4 ↓  | -0.827               | 8 ↓  | -0.281 | -0.578             | 0.017              | 3 ↓  |
| Southern Sub-Saharan Africa  | -1.425              | 6 ↓  | 0.260                | -0.013             | 0.535               | 10 ↑ | -0.744               | 9 ↓  | 0.268  | 0.098              | 0.439              | 9 ↑  |
| Western Sub-Saharan Africa   | 1.834               | 13 ↑ | -0.635               | -1.160             | -0.107              | 3 ↓  | 4.740                | 8 ↑  | -0.311 | -0.652             | 0.031              | 2 ↓  |
| North Africa and Middle East | 27.877              | 3 ↑  | 1.273                | 1.034              | 1.512               | 3 ↑  | 7.706                | 5 ↑  | 0.532  | 0.414              | 0.649              | 5 ↑  |
| Oceania                      | -10.388             | 2 ↓  | -0.207               | -0.331             | -0.083              | 6 ↓  | -0.052               | 10 ↓ | -0.008 | -0.019             | 0.003              | 5 ↓  |
| Australasia                  | 1.019               | 14 ↑ | 0.067                | 0.002              | 0.132               | 14 ↑ | -1.536               | 7 ↓  | 0.057  | -0.017             | 0.131              | 14 ↑ |
| Caribbean                    | -4.886              | 4 ↓  | -0.225               | -0.287             | -0.163              | 5 ↓  | -2.901               | 4 ↓  | -0.111 | -0.145             | -0.076             | 4 ↓  |

a: percent change.

b: annual percent change

c: confidence interval

**Supplementary Table 5: The relative contributions of each geographical locations in trends of infertility DALYs from 1990-2017.**

| Characteristics              | female                |                       | Male             |                  |
|------------------------------|-----------------------|-----------------------|------------------|------------------|
|                              | Increasing trend      | Decreasing trend      | Increasing trend | Decreasing trend |
|                              | Contribution rate (%) | Contribution rate (%) |                  |                  |
| Sociodemographic index       |                       |                       |                  |                  |
| Low                          | 18.31                 |                       | 31.83            |                  |
| Low-middle                   | 7.68                  |                       | 15.89            |                  |
| Middle                       | 16.08                 |                       | 20.85            |                  |
| Middle-High                  | 10.99                 |                       | 16.16            |                  |
| High                         | 46.95                 |                       | 15.27            |                  |
| Region                       |                       |                       |                  |                  |
| Central Asia                 | 1.81                  |                       | 2.52             |                  |
| Eastern Asia                 | 0.84                  |                       | 1.04             |                  |
| High-income Asia Pacific     |                       | 3.47                  | 0.82             |                  |
| South Asia                   | 5.61                  |                       | 4.53             |                  |
| Southeast Asia               | 9.57                  |                       | 8.64             |                  |
| Central Europe               | 6.20                  |                       | 3.32             |                  |
| Eastern Europe               | 1.47                  |                       | 3.38             |                  |
| Western Europe               | 3.53                  |                       | 4.91             |                  |
| Andean Latin America         | 24.11                 |                       | 23.67            |                  |
| Central Latin America        | 6.29                  |                       | 8.94             |                  |
| Southern Latin America       |                       | 23.34                 | 0.80             |                  |
| Tropical Latin America       | 16.29                 |                       | 14.36            |                  |
| North America                |                       | 25.27                 |                  | 34.42            |
| Central Sub-Saharan Africa   | 6.78                  |                       | 8.93             |                  |
| Eastern Sub-Saharan Africa   |                       | 12.01                 |                  | 25.92            |
| Southern Sub-Saharan Africa  | 2.85                  |                       | 4.42             |                  |
| Western Sub-Saharan Africa   |                       | 21.36                 |                  | 28.72            |
| North Africa and Middle East | 13.94                 |                       | 8.76             |                  |
| Oceania                      |                       | 6.98                  |                  | 0.75             |
| Australasia                  | 0.73                  |                       | 0.94             |                  |
| Caribbean                    |                       | 7.57                  |                  | 10.20            |

Please browse Full Text version to see the data of Supplementary Table 6.

**Supplementary Table 6. Trends in infertility age-standardized DALYs of 195 countries and territories from 1990-2017.**
