# Supplementary material for: Global, regional, and national prevalence and disability-adjusted life-years for infertility in 195 countries and territories, 1990–2017: results from a global burden of disease study, 2017
Source: PubMed Central journal article supplement (PMC6932903; doi:10.18632/aging.102497), 2019-12-02
Supplement: aging-11-102497-s004..pdf [file aging-11-102497-s004..pdf]

## SUPPLEMENTARY MATERIALS

### GBD OVERVIEW

#### Geographic units of the analysis

The locations included in GBD 2017 have been arranged into a set of hierarchical categories composed of seven super-regions and a further nested set of 21 regions containing 195 countries and territories (Appendix Table 1). Subnational estimation in GBD 2017 includes Brazil, China, India, Indonesia, Japan, Kenya, Mexico, South Africa, Sweden, the United Kingdom, and the United States, and new subnational assessments at the administrative one level for Ethiopia, Iran, Norway, and Russia and by Maori ethnicity for New Zealand. For this publication, we present subnational estimates in figures only for all subnational countries with the exception of the new assessments which will be reported in separate publications. Combined, there are a total of 390 locations at the first subnational unit level. Included in subnational Level 1 locations are countries that have been subdivided into the first subnational level, such as states or provinces, for the GBD analysis; subnational Level 2 only applies to India, England, and Russia. For this paper we present data at the national and territory level.

#### Time period of the analysis

A complete set of cause-specific prevalence, and YLD numbers and rates were computed for the years 1990, 1995, 2000, 2005, 2010, and 2017. All GBD 2017 results and online data visualisations are available at <http://vizhub.healthdata.org/gbd-compare1> with access to results for all GBD metrics.

#### Statement of GATHER compliance

This study complies with the Guidelines for Accurate and Transparent Health Estimates Reporting (GATHER) recommendations. We have documented the steps involved in our analytical procedures and detailed the data sources used in compliance with the GATHER.

The GATHER recommendations may be found here: <http://gather-statement.org/>

#### GBD results overview

Results from the Global Burden of Disease Study (GBD) are now measured in terabytes. Results are available in an interactive data downloading tool on the Global Health Data exchange (GHDx). Data and underlying code used for this analysis will be made publicly available pending manuscript acceptance.

The core summary results include years of life lost (YLLs), years lived with disability (YLDs), and disability-adjusted life-years (DALYs). The GHDx includes data for causes, risks, cause-risk attribution, aetiologies, and impairments.

#### Data input sources overview

GBD 2017 incorporated a large number and wide variety of input sources to estimate mortality, population, fertility, causes of death and illness, and risk factors for 195 countries and territories from 1990-2017. These input sources are accessible through an interactive citation tool available in the GHDx.

Users can retrieve citations for a specific GBD component, cause or risk, and geography by choosing from the available selection boxes. They can then view and access GHDx records for input sources and export a CSV file that includes the GHDx metadata, citations, and information about where the data were used in GBD. Additional metadata for each input source are available through the citation tool, as required by the GATHER statement.

#### Infertility Outcome estimation

Conceptually, the estimation effort is divided into eight major components: (1) compiling data sources through data identification and extraction; (2) data adjustment; (3) estimation of prevalence by cause and sequelae using DisMod-MR 2.1 or alternative modelling strategies for selected cause groups; (4) estimation by impairment; (5) severity distributions; (6) incorporation of disability weights; (7) comorbidity adjustment; and (8) the estimation of YLDs by sequelae and causes.

### DATA SOURCES, IDENTIFICATION, AND EXTRACTION

#### Systematic reviews

For GBD 2017, we conducted literature reviews for 82 non-fatal causes and one impairment through February 2018. For other disease sequelae, only a small fraction of the existing data appears in the published literature and other sources predominate such as survey data, disease registers, notification data or hospital inpatient data. As was done in GBD 2016, data were systematically screened from household surveys archived in the Global Health Data Exchange (<http://ghdx.healthdata.org/>), including Demographic and Health Surveys, Multiple Indicator Cluster Surveys, Living Standards Measurement Surveys, and Reproductive Health Surveys.

Other national health surveys were identified based on survey series that had yielded usable data for past rounds of GBD, sources suggested to us by in-country collaborators, and surveys identified in major multinational survey data catalogs, such as the International Household Survey Network and the World Health Organization (WHO) Central Data Catalog, as well as through country Ministry of Health and Central Statistical Office websites. Case notifications reported to the WHO were updated through 2017. Citations for all data sources used for nonfatal estimation in GBD 2017 are provided in searchable form through a web tool (<http://ghdx.healthdata.org/>).

### **Survey data preparation**

For GBD 2017, survey data for which we have access to the unit record data constitute a substantial part of the underlying data used in the estimation process. During extraction, we concentrate on demographic variables (such as location, sex, age), survey design variables (such as sampling strategy and sampling weights), and the variables used to define the population estimate (such as prevalence or a proportion) and a measure of uncertainty (standard error, confidence interval or sample size and number of cases).

### **Nonfatal disease registries**

For GBD 2017 nonfatal estimation, disease registries were an important source for a select number of conditions such as cancers, end-stage renal disease, and congenital disorders.

Registry data is particularly key in the estimation of neoplasms given the increasing attention to noncommunicable diseases, particularly cancers, in low and middle-income areas of the world. The GHDx source tool (<http://ghdx.healthdata.org/data-type/disease-registry>) provides a comprehensive list of registry data used in GBD estimation processes.

### **Data adjustment**

In addition to the corrections applied to claims and hospital data, a number of other adjustments were applied to extracted nonfatal sources in order to make the data more consistent and suitable for modelling. In this second step of nonfatal estimation, commonly applied adjustments included age-sex splitting, bias correction, adjustments for underreporting of notification data, and computing expected values of excess mortality. Age-sex splitting was commonly applied to literature data reported by age or sex but not by age and sex. For GBD 2017, we split all data reported in age groups with a width greater than 20

years, using age patterns from available survey microdata or regional patterns derived from an initial run of main modelling tool, DisMod-MR 2.1. We relied on the meta-regression component of DisMod-MR 2.1 for most of the bias correction of data for variations in study attributes such as case definitions and measurement method. DisMod-MR 2.1 calculates a single adjustment that is applied regardless of age, sex, or location. If enough data were available to differentiate these adjustments by age, sex, or location, or if detailed survey data were available to make more precise adjustments between different thresholds on a biochemical measure, we applied bias corrections to the data before entry into DisMod-MR 2.1. For instance, we crosswalked between 12 different case definitions with different thresholds of fasting plasma glucose or glycated hemoglobin levels for diabetes mellitus based on available survey data with individual records of the actual measurements. In another example, we corrected data on COPD from surveys applying different thresholds on spirometry measurements using studies that had reported on prevalence of COPD for the reference and alternative thresholds. As this relationship varied with age, age-specific correction factors were derived. The correction of notification data for underreporting relied on studies that had examined the gap between true incidence and notified cases.

## **IMPAIRMENT AND UNDERLYING CAUSE ESTIMATION**

Impairments in GBD are conditions or specific domains of functional health loss which are spread across many GBD causes as sequelae and for which there are better data to estimate the occurrence of the overall impairment than for each sequela based on the underlying cause. Overall impairment prevalence was estimated using DisMod-MR 2.1. We constrained cause-specific estimates of impairments, as in the 19 causes of blindness, to sum to the total prevalence estimated for that impairment. Estimates were made separately for primary infertility (those unable to conceive), secondary infertility (those having trouble conceiving again), and whether the impairment affected men and/or women.

### **Disability weights**

To compute YLDs for a particular health outcome in a given population, the number of people living with that outcome is multiplied by a disability weight that represents the magnitude of health loss associated with the outcome. Disability weights are measured on a scale from 0 to 1, with 0 implying a state that is equivalent to full health and 1 a state equivalent to death.

Disability weights used in GBD studies prior to GBD 2010 have been criticized for the method used (person trade-off), the small elite panel of international public health experts who determined the weights and the lack of consistency over time as the GBD cause list expanded and additional disability weights from a study in the Netherlands<sup>24</sup> were added or others derived by ad-hoc methods.

### YLD computation, uncertainty, and residual YLDs

For GBD 2017, we computed YLDs by sequela as prevalence multiplied by the disability weight for the health state associated with that sequela. The uncertainty ranges reported around YLDs incorporates uncertainty in prevalence and uncertainty in the disability weight. To do this, we take the 1,000 samples of comorbidity-corrected YLDs and 1,000 samples of the disability weight to generate 1,000 samples of the YLD distribution. We assume no correlation in the uncertainty in prevalence and disability weights. The 95% uncertainty interval is reported as the 25th and 975th values of the distribution. Uncertainty intervals for YLDs at different points in time (1990, 1995, 2000, 2005, 2010, and 2016) for a given disease or sequela are correlated because of the shared uncertainty in the disability weight. For this reason, changes in YLDs over time can be significant even if the uncertainty intervals of the two estimates of YLDs largely overlap as significance is determined by the uncertainty around the prevalence estimates.

### Socio-demographic Index (SDI) analysis and epidemiological transition

The Socio-demographic Index (SDI) is a composite indicator of development status strongly correlated with health outcomes. In short, it is the geometric mean of 0 to 1 indices of total fertility rate under the age of 25 (TFU25), mean education for those aged 15 and older (EDU15+), and lag distributed income (LDI) per capita.

#### Development of revised SDI indicator

SDI was originally constructed for GBD 2015 using the Human Development Index (HDI) methodology,

wherein a 0 to 1 index value was determined for each of the original three covariate inputs (total fertility rate in ages 15 to 49, EDU15+, and LDI per capita) using the observed minima and maxima over the estimation period to set the scales.

In response to feedback from collaborators and the evolution of the GBD, we have refined the indicator with each GBD cycle. For GBD 2017, in conjunction with our expanded estimation of age-specific fertility, we chose to replace the total fertility rate as one of the three component indices with the total fertility rate under 25 (TFU25). The TFU25 provides a better measure of women's status in society, as it focuses on ages where childbearing disrupts the pursuit of education and entrance into the workforce.

During GBD 2016 we moved from using relative index scales to absolute scales to enhance the stability of SDIs interpretation over time, as we noticed that the measure was highly sensitive to the addition of subnational units that tended to stretch the empirical minima and maxima. We selected the minima and maxima of the scales by examining the relationships each of the inputs had with life expectancy at birth and under-5 mortality and identifying points of limiting returns at both high and low values, if they occurred prior to theoretical limits (e.g., a TFU25 of 0).

Thus, an index score of 0 represents the minimum level of each covariate input past which selected health outcomes can get no worse, while an index score of 1 represents the maximum level of each covariate input past which selected health outcomes cease to improve. As a composite, a location with an SDI of 0 would have a theoretical minimum level of development relevant to these health outcomes, while a location with an SDI of 1 would have a theoretical maximum level of development relevant to these health outcomes.

The composite Socio-Demographic Index is the geometric mean of these three indices for a given location year. The cutoff values used to determine quintiles for analysis were then computed using country-level estimates of SDI for the year 2017.

The table below illustrates Socio-Demographic Index groupings by location, based on 2017 values

| Location Name                                    | 2017 SDI Index Value | SDI Quintile    |
|--------------------------------------------------|----------------------|-----------------|
| Global                                           | 0.652205351          |                 |
| Central Europe, Eastern Europe, and Central Asia | 0.765735064          |                 |
| Central Asia                                     | 0.672778523          |                 |
| Armenia                                          | 0.702021479          | High-middle SDI |

|                          |             |                 |
|--------------------------|-------------|-----------------|
| Azerbaijan               | 0.701169598 | High-middle SDI |
| Georgia                  | 0.699719344 | High-middle SDI |
| Kazakhstan               | 0.735474229 | High-middle SDI |
| Kyrgyzstan               | 0.606646902 | Low-middle SDI  |
| Mongolia                 | 0.661854015 | Middle SDI      |
| Tajikistan               | 0.522612209 | Low-middle SDI  |
| Turkmenistan             | 0.696418617 | Middle SDI      |
| Uzbekistan               | 0.629546531 | Middle SDI      |
| Central Europe           | 0.813976167 |                 |
| Albania                  | 0.684614242 | Middle SDI      |
| Bosnia and Herzegovina   | 0.712609905 | High-middle SDI |
| Bulgaria                 | 0.79173721  | High-middle SDI |
| Croatia                  | 0.824844721 | High SDI        |
| Czech Republic           | 0.850980459 | High SDI        |
| Hungary                  | 0.816804322 | High-middle SDI |
| Macedonia                | 0.75436361  | High-middle SDI |
| Montenegro               | 0.788188778 | High-middle SDI |
| Poland                   | 0.84377326  | High SDI        |
| Romania                  | 0.784193905 | High-middle SDI |
| Serbia                   | 0.75179332  | High-middle SDI |
| Slovakia                 | 0.841690487 | High SDI        |
| Slovenia                 | 0.860279598 | High SDI        |
| Eastern Europe           | 0.785420363 |                 |
| Belarus                  | 0.772665439 | High-middle SDI |
| Estonia                  | 0.857709406 | High SDI        |
| Latvia                   | 0.825131484 | High SDI        |
| Lithuania                | 0.840877452 | High SDI        |
| Moldova                  | 0.675572758 | Middle SDI      |
| Russian Federation       | 0.791738063 | High-middle SDI |
| Ukraine                  | 0.740061596 | High-middle SDI |
| High-income              | 0.854428248 |                 |
| Australasia              | 0.868509969 |                 |
| Australia                | 0.873188291 | High SDI        |
| New Zealand              | 0.842273544 | High SDI        |
| High-income Asia Pacific | 0.86894981  |                 |
| Brunei                   | 0.856240565 | High SDI        |
| Japan                    | 0.865093512 | High SDI        |
| Aichi                    | 0.874998978 | High SDI        |
| Akita                    | 0.829009097 | High SDI        |
| Aomori                   | 0.825175188 | High SDI        |
| Chiba                    | 0.859238574 | High SDI        |
| Ehime                    | 0.838399264 | High SDI        |
| Fukui                    | 0.852281964 | High SDI        |
| Fukuoka                  | 0.855307883 | High SDI        |
| Fukushima                | 0.830930555 | High SDI        |
| Gifu                     | 0.84923591  | High SDI        |

|                           |             |                 |
|---------------------------|-------------|-----------------|
| Gunma                     | 0.850963336 | High SDI        |
| Hiroshima                 | 0.862595627 | High SDI        |
| Hokkaido                  | 0.841522308 | High SDI        |
| Hyogo                     | 0.859765235 | High SDI        |
| Ibaraki                   | 0.850665189 | High SDI        |
| Ishikawa                  | 0.856039392 | High SDI        |
| Iwate                     | 0.825241842 | High SDI        |
| Kagawa                    | 0.849935485 | High SDI        |
| Kagoshima                 | 0.829680279 | High SDI        |
| Kanagawa                  | 0.874939342 | High SDI        |
| Kochi                     | 0.825446834 | High SDI        |
| Kumamoto                  | 0.831536501 | High SDI        |
| Kyoto                     | 0.87256007  | High SDI        |
| Mie                       | 0.853567757 | High SDI        |
| Miyagi                    | 0.850313137 | High SDI        |
| Miyazaki                  | 0.823112655 | High SDI        |
| Nagano                    | 0.851209245 | High SDI        |
| Nagasaki                  | 0.826141869 | High SDI        |
| Nara                      | 0.847998888 | High SDI        |
| Niigata                   | 0.843300137 | High SDI        |
| Oita                      | 0.845989117 | High SDI        |
| Okayama                   | 0.855866898 | High SDI        |
| Okinawa                   | 0.817915416 | High SDI        |
| Osaka                     | 0.872366437 | High SDI        |
| Saga                      | 0.833665065 | High SDI        |
| Saitama                   | 0.8520121   | High SDI        |
| Shiga                     | 0.870844353 | High SDI        |
| Shimane                   | 0.831040466 | High SDI        |
| Shizuoka                  | 0.858790953 | High SDI        |
| Tochigi                   | 0.853264467 | High SDI        |
| Tokushima                 | 0.845285    | High SDI        |
| Tokyo                     | 0.924328028 | High SDI        |
| Tottori                   | 0.83436659  | High SDI        |
| Toyama                    | 0.859824207 | High SDI        |
| Wakayama                  | 0.839775092 | High SDI        |
| Yamagata                  | 0.831923683 | High SDI        |
| Yamaguchi                 | 0.849441807 | High SDI        |
| Yamanashi                 | 0.854296098 | High SDI        |
| South Korea               | 0.871955704 | High SDI        |
| Singapore                 | 0.872215248 | High SDI        |
| High-income North America | 0.868169406 |                 |
| Canada                    | 0.882086227 | High SDI        |
| Greenland                 | 0.760075292 | High-middle SDI |
| United States             | 0.86662166  | High SDI        |
| Alabama                   | 0.837233514 | High SDI        |
| Alaska                    | 0.86060992  | High SDI        |

|                      |             |          |
|----------------------|-------------|----------|
| Arizona              | 0.845107314 | High SDI |
| Arkansas             | 0.826148933 | High SDI |
| California           | 0.872398094 | High SDI |
| Colorado             | 0.882128544 | High SDI |
| Connecticut          | 0.906486727 | High SDI |
| Delaware             | 0.873744053 | High SDI |
| District of Columbia | 0.890203139 | High SDI |
| Florida              | 0.863631092 | High SDI |
| Georgia              | 0.848426298 | High SDI |
| Hawaii               | 0.872290363 | High SDI |
| Idaho                | 0.840713155 | High SDI |
| Illinois             | 0.879386003 | High SDI |
| Indiana              | 0.84792909  | High SDI |
| Iowa                 | 0.8704793   | High SDI |
| Kansas               | 0.864464964 | High SDI |
| Kentucky             | 0.83130395  | High SDI |
| Louisiana            | 0.834894869 | High SDI |
| Maine                | 0.872309993 | High SDI |
| Maryland             | 0.895667105 | High SDI |
| Massachusetts        | 0.913307727 | High SDI |
| Michigan             | 0.867717003 | High SDI |
| Minnesota            | 0.892987345 | High SDI |
| Mississippi          | 0.818942009 | High SDI |
| Missouri             | 0.85325798  | High SDI |
| Montana              | 0.863383139 | High SDI |
| Nebraska             | 0.87308561  | High SDI |
| Nevada               | 0.847315003 | High SDI |
| New Hampshire        | 0.904304115 | High SDI |
| New Jersey           | 0.899124902 | High SDI |
| New Mexico           | 0.835274776 | High SDI |
| New York             | 0.893442339 | High SDI |
| North Carolina       | 0.84978326  | High SDI |
| North Dakota         | 0.879820384 | High SDI |
| Ohio                 | 0.858271211 | High SDI |
| Oklahoma             | 0.838181089 | High SDI |
| Oregon               | 0.870700326 | High SDI |
| Pennsylvania         | 0.878553277 | High SDI |
| Rhode Island         | 0.890036984 | High SDI |
| South Carolina       | 0.846024965 | High SDI |
| South Dakota         | 0.860188872 | High SDI |
| Tennessee            | 0.836985155 | High SDI |
| Texas                | 0.837777472 | High SDI |
| Utah                 | 0.855766922 | High SDI |
| Vermont              | 0.89559193  | High SDI |
| Virginia             | 0.885122306 | High SDI |
| Washington           | 0.88440099  | High SDI |



|                             |             |                 |
|-----------------------------|-------------|-----------------|
| West Virginia               | 0.824706332 | High SDI        |
| Wisconsin                   | 0.87773172  | High SDI        |
| Wyoming                     | 0.869345173 | High SDI        |
| Southern Latin America      | 0.720171023 |                 |
| Argentina                   | 0.710150584 | High-middle SDI |
| Chile                       | 0.748081344 | High-middle SDI |
| Uruguay                     | 0.706753401 | High-middle SDI |
| Western Europe              | 0.856820142 |                 |
| Andorra                     | 0.901838419 | High SDI        |
| Austria                     | 0.866029424 | High SDI        |
| Belgium                     | 0.886479194 | High SDI        |
| Cyprus                      | 0.86457342  | High SDI        |
| Denmark                     | 0.917864091 | High SDI        |
| Finland                     | 0.892872363 | High SDI        |
| France                      | 0.864667258 | High SDI        |
| Germany                     | 0.869902009 | High SDI        |
| Greece                      | 0.816993531 | High SDI        |
| Iceland                     | 0.907023083 | High SDI        |
| Ireland                     | 0.882181159 | High SDI        |
| Israel                      | 0.81594436  | High-middle SDI |
| Italy                       | 0.843401161 | High SDI        |
| Luxembourg                  | 0.915748227 | High SDI        |
| Malta                       | 0.835898842 | High SDI        |
| Netherlands                 | 0.911855053 | High SDI        |
| Norway                      | 0.910905362 | High SDI        |
| Portugal                    | 0.777927627 | High-middle SDI |
| Spain                       | 0.824616837 | High SDI        |
| Sweden                      | 0.883490275 | High SDI        |
| Stockholm                   | 0.914447593 | High SDI        |
| Sweden except Stockholm     | 0.872833379 | High SDI        |
| Switzerland                 | 0.888752501 | High SDI        |
| United Kingdom              | 0.843093074 | High SDI        |
| England                     | 0.848869853 | High SDI        |
| East Midlands               | 0.83007704  | High SDI        |
| East of England             | 0.840300066 | High SDI        |
| Greater London              | 0.894369062 | High SDI        |
| North East England          | 0.820735615 | High SDI        |
| North West England          | 0.833664296 | High SDI        |
| South East England          | 0.856169812 | High SDI        |
| South West England          | 0.841270041 | High SDI        |
| West Midlands               | 0.829368047 | High SDI        |
| Yorkshire and the Humber    | 0.829690925 | High SDI        |
| Northern Ireland            | 0.835352065 | High SDI        |
| Scotland                    | 0.805372811 | High SDI        |
| Wales                       | 0.805748561 | High SDI        |
| Latin America and Caribbean | 0.639865451 |                 |

|                                  |             |                 |
|----------------------------------|-------------|-----------------|
| Andean Latin America             | 0.628313955 |                 |
| Bolivia                          | 0.587409304 | Low-middle SDI  |
| Ecuador                          | 0.635566909 | Middle SDI      |
| Peru                             | 0.635787809 | Middle SDI      |
| Caribbean                        | 0.637604561 |                 |
| Antigua and Barbuda              | 0.715130979 | High-middle SDI |
| The Bahamas                      | 0.75556215  | High-middle SDI |
| Barbados                         | 0.739423177 | High-middle SDI |
| Belize                           | 0.602243591 | Low-middle SDI  |
| Bermuda                          | 0.80545317  | High-middle SDI |
| Cuba                             | 0.687667664 | Middle SDI      |
| Dominica                         | 0.68658657  | Middle SDI      |
| Dominican Republic               | 0.592640504 | Low-middle SDI  |
| Grenada                          | 0.640418422 | Middle SDI      |
| Guyana                           | 0.583747015 | Low-middle SDI  |
| Haiti                            | 0.441665969 | Low SDI         |
| Jamaica                          | 0.678532504 | Middle SDI      |
| Puerto Rico                      | 0.812984477 | High-middle SDI |
| Saint Lucia                      | 0.652614198 | Middle SDI      |
| Saint Vincent and the Grenadines | 0.608304473 | Middle SDI      |
| Suriname                         | 0.64099299  | Middle SDI      |
| Trinidad and Tobago              | 0.698405348 | Middle SDI      |
| Virgin Islands, U.S.             | 0.806568682 | High-middle SDI |
| Central Latin America            | 0.623192305 |                 |
| Colombia                         | 0.633692252 | Middle SDI      |
| Costa Rica                       | 0.662129526 | Middle SDI      |
| El Salvador                      | 0.59309467  | Low-middle SDI  |
| Guatemala                        | 0.524214498 | Low-middle SDI  |
| Honduras                         | 0.512339813 | Low-middle SDI  |
| Mexico                           | 0.628360997 | Middle SDI      |
| Aguascalientes                   | 0.659089353 | Middle SDI      |
| Baja California                  | 0.656785464 | Middle SDI      |
| Baja California Sur              | 0.658976353 | Middle SDI      |
| Campeche                         | 0.615914899 | Middle SDI      |
| Chiapas                          | 0.53276266  | Middle SDI      |
| Chihuahua                        | 0.638589391 | Middle SDI      |
| Coahuila                         | 0.645326148 | Middle SDI      |
| Colima                           | 0.65420353  | Middle SDI      |
| Durango                          | 0.623979236 | Middle SDI      |
| Guanajuato                       | 0.62129178  | Middle SDI      |
| Guerrero                         | 0.562442968 | Middle SDI      |
| Hidalgo                          | 0.587458446 | Middle SDI      |
| Jalisco                          | 0.648991934 | Middle SDI      |
| Mexico                           | 0.635428465 | Middle SDI      |
| Mexico City                      | 0.715772109 | Middle SDI      |
| Michoacan de Ocampo              | 0.58646838  | Middle SDI      |



|                                 |             |                 |
|---------------------------------|-------------|-----------------|
| Morelos                         | 0.635471941 | Middle SDI      |
| Nayarit                         | 0.620025881 | Middle SDI      |
| Nuevo Leon                      | 0.677420872 | Middle SDI      |
| Oaxaca                          | 0.560543467 | Middle SDI      |
| Puebla                          | 0.584252823 | Middle SDI      |
| Queretaro                       | 0.639127345 | Middle SDI      |
| Quintana Roo                    | 0.626303085 | Middle SDI      |
| San Luis Potosi                 | 0.620944629 | Middle SDI      |
| Sinaloa                         | 0.648534168 | Middle SDI      |
| Sonora                          | 0.650495685 | Middle SDI      |
| Tabasco                         | 0.611463527 | Middle SDI      |
| Tamaulipas                      | 0.647006129 | Middle SDI      |
| Tlaxcala                        | 0.604441163 | Middle SDI      |
| Veracruz de Ignacio de la Llave | 0.591994    | Middle SDI      |
| Yucatan                         | 0.63033024  | Middle SDI      |
| Zacatecas                       | 0.607654208 | Middle SDI      |
| Nicaragua                       | 0.529616174 | Low-middle SDI  |
| Panama                          | 0.677043867 | Middle SDI      |
| Venezuela                       | 0.655413104 | Middle SDI      |
| Tropical Latin America          | 0.662126282 |                 |
| Brazil                          | 0.663312473 | Middle SDI      |
| Acre                            | 0.601605235 | Low-middle SDI  |
| Alagoas                         | 0.555715012 | Low-middle SDI  |
| Amapa                           | 0.658517629 | Middle SDI      |
| Amazonas                        | 0.629315711 | Middle SDI      |
| Bahia                           | 0.591019766 | Low-middle SDI  |
| Ceara                           | 0.599501511 | Low-middle SDI  |
| Distrito Federal                | 0.79189036  | High-middle SDI |
| Espirito Santo                  | 0.676646695 | Middle SDI      |
| Goias                           | 0.650146424 | Middle SDI      |
| Maranhao                        | 0.507040138 | Low-middle SDI  |
| Mato Grosso                     | 0.662454796 | Middle SDI      |
| Mato Grosso do Sul              | 0.650210546 | Middle SDI      |
| Minas Gerais                    | 0.660795264 | Middle SDI      |
| Para                            | 0.578664243 | Low-middle SDI  |
| Paraiba                         | 0.574462555 | Low-middle SDI  |
| Parana                          | 0.682436727 | Middle SDI      |
| Pernambuco                      | 0.593552542 | Low-middle SDI  |
| Piaui                           | 0.551619925 | Low-middle SDI  |
| Rio de Janeiro                  | 0.708855843 | High-middle SDI |
| Rio Grande do Norte             | 0.605294307 | Low-middle SDI  |
| Rio Grande do Sul               | 0.6927427   | Middle SDI      |
| Rondonia                        | 0.621702361 | Middle SDI      |
| Roraima                         | 0.646354751 | Middle SDI      |
| Santa Catarina                  | 0.702495682 | High-middle SDI |
| Sao Paulo                       | 0.7200519   | High-middle SDI |

|                                        |             |                 |
|----------------------------------------|-------------|-----------------|
| Sergipe                                | 0.615627706 | Middle SDI      |
| Tocantins                              | 0.610879077 | Middle SDI      |
| Paraguay                               | 0.618769591 | Middle SDI      |
| North Africa and Middle East           | 0.638603537 |                 |
| North Africa and Middle East           | 0.638603537 |                 |
| Afghanistan                            | 0.290254968 | Low SDI         |
| Algeria                                | 0.695849021 | Middle SDI      |
| Bahrain                                | 0.712258604 | High-middle SDI |
| Egypt                                  | 0.604307711 | Low-middle SDI  |
| Iran                                   | 0.700086759 | High-middle SDI |
| Iraq                                   | 0.584823813 | Low-middle SDI  |
| Jordan                                 | 0.696845045 | Middle SDI      |
| Kuwait                                 | 0.785593198 | High-middle SDI |
| Lebanon                                | 0.729621127 | High-middle SDI |
| Libya                                  | 0.760934217 | High-middle SDI |
| Morocco                                | 0.579231309 | Low-middle SDI  |
| Palestine                              | 0.541353069 | Low-middle SDI  |
| Oman                                   | 0.743531097 | High-middle SDI |
| Qatar                                  | 0.765715882 | High-middle SDI |
| Saudi Arabia                           | 0.7790137   | High-middle SDI |
| Sudan                                  | 0.477915229 | Low-middle SDI  |
| Syria                                  | 0.611084286 | Middle SDI      |
| Tunisia                                | 0.675428611 | Middle SDI      |
| Turkey                                 | 0.729481001 | High-middle SDI |
| United Arab Emirates                   | 0.794722025 | High-middle SDI |
| Yemen                                  | 0.429504407 | Low SDI         |
| South Asia                             | 0.533975763 |                 |
| South Asia                             | 0.533975763 |                 |
| Bangladesh                             | 0.457988721 | Low SDI         |
| Bhutan                                 | 0.569907913 | Low-middle SDI  |
| India                                  | 0.550242018 | Low-middle SDI  |
| Nepal                                  | 0.428511471 | Low SDI         |
| Pakistan                               | 0.492158484 | Low-middle SDI  |
| Southeast Asia, East Asia, and Oceania | 0.685403755 |                 |
| East Asia                              | 0.708630758 |                 |
| China                                  | 0.707319288 | High-middle SDI |
| North Korea                            | 0.537679957 | Low-middle SDI  |
| Taiwan                                 | 0.86418562  | High SDI        |
| Oceania                                | 0.470985744 |                 |
| American Samoa                         | 0.701859796 | High-middle SDI |
| Federated States of Micronesia         | 0.575251612 | Low-middle SDI  |
| Fiji                                   | 0.641435501 | Middle SDI      |
| Guam                                   | 0.794193119 | High-middle SDI |
| Kiribati                               | 0.426768011 | Low SDI         |
| Marshall Islands                       | 0.550457832 | Low-middle SDI  |
| Northern Mariana Islands               | 0.75781722  | High-middle SDI |

|                         |             |                 |
|-------------------------|-------------|-----------------|
| Papua New Guinea        | 0.418998443 | Low SDI         |
| Samoa                   | 0.576375166 | Low-middle SDI  |
| Solomon Islands         | 0.425018528 | Low SDI         |
| Tonga                   | 0.624951156 | Middle SDI      |
| Vanuatu                 | 0.475309121 | Low-middle SDI  |
| Southeast Asia          | 0.640717246 |                 |
| Cambodia                | 0.481619391 | Low-middle SDI  |
| Indonesia               | 0.647611359 | Middle SDI      |
| Aceh                    | 0.640414411 | Middle SDI      |
| Bali                    | 0.646777358 | Middle SDI      |
| Bangka-Belitung Islands | 0.637063919 | Middle SDI      |
| Banten                  | 0.636136405 | Middle SDI      |
| Bengkulu                | 0.605588458 | Low-middle SDI  |
| Gorontalo               | 0.556881893 | Low-middle SDI  |
| Jakarta                 | 0.795041917 | High-middle SDI |
| Jambi                   | 0.640546524 | Middle SDI      |
| West Java               | 0.635672599 | Middle SDI      |
| Central Java            | 0.606724047 | Middle SDI      |
| East Java               | 0.64169154  | Middle SDI      |
| West Kalimantan         | 0.589201584 | Low-middle SDI  |
| South Kalimantan        | 0.623798672 | Middle SDI      |
| Central Kalimantan      | 0.641894718 | Middle SDI      |
| East Kalimantan         | 0.746595227 | High-middle SDI |
| North Kalimantan        | 0.755952734 | High-middle SDI |
| Riau Islands            | 0.727599596 | High-middle SDI |
| Lampung                 | 0.616299987 | Middle SDI      |
| Maluku                  | 0.555610326 | Low-middle SDI  |
| North Maluku            | 0.546157963 | Low-middle SDI  |
| West Nusa Tenggara      | 0.556566054 | Low-middle SDI  |
| East Nusa Tenggara      | 0.518912804 | Low-middle SDI  |
| Papua                   | 0.587862719 | Low-middle SDI  |
| West Papua              | 0.683007739 | Middle SDI      |
| Riau                    | 0.713955299 | High-middle SDI |
| West Sulawesi           | 0.559336878 | Low-middle SDI  |
| South Sulawesi          | 0.610967812 | Middle SDI      |
| Central Sulawesi        | 0.612199879 | Middle SDI      |
| Southeast Sulawesi      | 0.596388581 | Low-middle SDI  |
| North Sulawesi          | 0.651649236 | Middle SDI      |
| West Sumatra            | 0.640858055 | Middle SDI      |
| South Sumatra           | 0.642344679 | Middle SDI      |
| North Sumatra           | 0.653390877 | Middle SDI      |
| Yogyakarta              | 0.65012062  | Middle SDI      |
| Laos                    | 0.518788871 | Low-middle SDI  |
| Malaysia                | 0.759248836 | High-middle SDI |
| Maldives                | 0.655286841 | Middle SDI      |
| Mauritius               | 0.720190502 | High-middle SDI |

|                                  |             |                |
|----------------------------------|-------------|----------------|
| Myanmar                          | 0.555817824 | Low-middle SDI |
| Philippines                      | 0.617174396 | Middle SDI     |
| Sri Lanka                        | 0.679706328 | Middle SDI     |
| Seychelles                       | 0.692334035 | Middle SDI     |
| Thailand                         | 0.684276785 | Middle SDI     |
| Timor-Leste                      | 0.504842989 | Low-middle SDI |
| Vietnam                          | 0.606829222 | Middle SDI     |
| Sub-Saharan Africa               | 0.445980066 |                |
| Central Sub-Saharan Africa       | 0.45690943  |                |
| Angola                           | 0.460535938 | Low-middle SDI |
| Central African Republic         | 0.334449009 | Low SDI        |
| Congo                            | 0.574129526 | Low-middle SDI |
| Democratic Republic of the Congo | 0.364453165 | Low SDI        |
| Equatorial Guinea                | 0.62522322  | Middle SDI     |
| Gabon                            | 0.650559028 | Middle SDI     |
| Eastern Sub-Saharan Africa       | 0.387060963 |                |
| Burundi                          | 0.309705632 | Low SDI        |
| Comoros                          | 0.434289553 | Low SDI        |
| Djibouti                         | 0.484750347 | Low-middle SDI |
| Eritrea                          | 0.408790995 | Low SDI        |
| Ethiopia                         | 0.334181415 | Low SDI        |
| Kenya                            | 0.499471993 | Low-middle SDI |
| Madagascar                       | 0.330760552 | Low SDI        |
| Malawi                           | 0.349345085 | Low SDI        |
| Mozambique                       | 0.340470577 | Low SDI        |
| Rwanda                           | 0.40744149  | Low SDI        |
| Somalia                          | 0.234806633 | Low SDI        |
| South Sudan                      | 0.274705978 | Low SDI        |
| Tanzania                         | 0.412207128 | Low SDI        |
| Uganda                           | 0.387738241 | Low SDI        |
| Zambia                           | 0.472213354 | Low-middle SDI |
| Southern Sub-Saharan Africa      | 0.639979771 |                |
| Botswana                         | 0.663238118 | Middle SDI     |
| Lesotho                          | 0.493356884 | Low-middle SDI |
| Namibia                          | 0.615792035 | Middle SDI     |
| South Africa                     | 0.676542582 | Middle SDI     |
| Swaziland                        | 0.577699713 | Low-middle SDI |
| Zimbabwe                         | 0.463195841 | Low-middle SDI |
| Western Sub-Saharan Africa       | 0.441032713 |                |
| Benin                            | 0.373374857 | Low SDI        |
| Burkina Faso                     | 0.283938202 | Low SDI        |
| Cameroon                         | 0.482039386 | Low-middle SDI |
| Cape Verde                       | 0.549086441 | Low-middle SDI |
| Chad                             | 0.252901641 | Low SDI        |
| Cote d'Ivoire                    | 0.412139874 | Low SDI        |
| The Gambia                       | 0.404759628 | Low SDI        |

|                       |             |                |
|-----------------------|-------------|----------------|
| Ghana                 | 0.536972566 | Low-middle SDI |
| Guinea                | 0.324710505 | Low SDI        |
| Guinea-Bissau         | 0.348986787 | Low SDI        |
| Liberia               | 0.328416338 | Low SDI        |
| Mali                  | 0.266900909 | Low SDI        |
| Mauritania            | 0.470565798 | Low-middle SDI |
| Niger                 | 0.190617687 | Low SDI        |
| Nigeria               | 0.49339389  | Low-middle SDI |
| Sao Tome and Principe | 0.488258275 | Low-middle SDI |
| Senegal               | 0.373026564 | Low SDI        |
| Sierra Leone          | 0.357159036 | Low SDI        |
| Togo                  | 0.413313302 | Low SDI        |

## INFERTILITY CASE DEFINITION AND MODELLING SUMMARY

**For GBD 2017, the following case definitions were used for infertility:**

1. Primary infertility is defined as a couple who have not had a livebirth, who wish a child, and have been in a union for more than five years without using contraceptives.
2. Secondary infertility is defined in a couple who wish a child and have been in a union for more than five years without using contraceptives since the last livebirth.

Estimation is completed in three steps. First, we estimate total primary (unable to have any child) and secondary (unable to have an additional child) infertility in couples. This is accomplished by first quantifying the rate of infertility among survey respondents who are married (the subset to whom such questions are directed) and then quantifying how the married population relates to the overall population. Second, we model which proportion of primary and secondary infertility is due to female and male factor, respectively, to estimate four “envelopes” of infertility: male primary infertility, male secondary infertility, female primary infertility, and female secondary infertility. Third, we execute a “causal attribution” process to assign cases of each envelope to likely underlying causes and assign the remainder to idiopathic infertility (ie, unknown causes).

### Input data

Our primary data sources are population surveys. The datasets were last updated for GBD 2015. Data extraction included data for women in five-year age

groups between 15 and 49 from population-based surveys including the Demographic and Health Surveys (DHS), World Fertility Surveys (WFS), Reproductive Health Surveys (RHS), Family and Fertility Survey (FFS), and others (EUR, NSF, PCD, PFM). Such surveys only ask fertility-related questions to married women. Even though only women are interviewed, we treated the responses as a proxy for the infertility of couples in unions because the questions are not structured in a way that it is possible to determine which partner is the cause of the couples’ inability to conceive a child.

The desire to have a child is the crucial determinant of whether a couple is labeled as infertile (ie, if no child is wanted, infertility is not present).

The combination of variables in surveys that were used to construct each of the four datasets (primary “impairment” and “exposure” and secondary “impairment” and “exposure”) are illustrated in the table below. As described below, overall primary and secondary infertility are estimated by multiplying prevalence among those with the “impairment” of infertility (married women who desire a[nother] child) by the prevalence of the “exposure” (being married for 5+ years, not using contraception for 5+ years).

| Model name           | Infertility type                                    | Numerator                                                                                             | Denominator      |
|----------------------|-----------------------------------------------------|-------------------------------------------------------------------------------------------------------|------------------|
| Primary (impairment) | Exposure to primary infertility among married women | Married 5+ years; no contraception for 5+ years prior to survey; no previous births; desires a child. | Married 5+ years |

|                        |                                                       |                                                                                                            |                               |
|------------------------|-------------------------------------------------------|------------------------------------------------------------------------------------------------------------|-------------------------------|
| Primary (exposure)     | Prevalence of exposure                                | Married 5+ years; no contraception for 5+ plus years prior to survey                                       | All women                     |
| Secondary (impairment) | Exposure to secondary infertility among married women | Married 5+ years; no contraception for 5+ years prior to survey; last birth 5+ years ago; desires a child. | Married 5+ years; 1+ children |
| Secondary (exposure)   | Prevalence of exposure to secondary infertility       | married 5+ years; no contraception for 5+ years prior to survey; 1+ children                               | All women                     |

The table below illustrates the extent of data coverage for the infertility envelope models for GBD 2017.

| Primary infertility impairment                                 | Prevalence |
|----------------------------------------------------------------|------------|
| Site-years (total)                                             | 325        |
| Number of countries with data                                  | 113        |
| Number of GBD regions with data (out of 21 regions)            | 20         |
| Number of GBD super-regions with data (out of 7 super-regions) | 7          |
| Primary infertility exposure                                   | Prevalence |
| Site-years (total)                                             | 274        |
| Number of countries with data                                  | 101        |
| Number of GBD regions with data (out of 21 regions)            | 17         |
| Number of GBD super-regions with data (out of 7 super-regions) | 7          |
| Secondary infertility impairment                               | Prevalence |
| Site-years (total)                                             | 327        |
| Number of countries with data                                  | 112        |
| Number of GBD regions with data (out of 21 regions)            | 19         |
| Number of GBD super-regions with data (out of 7 super-regions) | 7          |
| Secondary infertility exposure                                 | Prevalence |
| Site-years (total)                                             | 274        |
| Number of countries with data                                  | 101        |
| Number of GBD regions with data (out of 21 regions)            | 17         |
| Number of GBD super-regions with data (out of 7 super-regions) | 7          |

The second set of four datasets informed estimates of which component of primary and secondary infertility were due to female and male factors, respectively. To obtain data on the sex and cause breakdown for infertility, we systematically searched the literature in GBD 2010 using the following search string:

causes[Title/abstract] AND infertility[Title] NOT mouse NOT murine NOT rat NOT rodent

We received 626 hits from PubMed and excluded studies according to the following exclusion criteria:

1. studies not representative of the national population;
2. studies that provide no raw data,
3. studies that provide only estimates;
4. studies performed before 1970;
5. case studies or studies with sample size less than 50;
6. studies that provide no data on the sex of the partner responsible for infertility among couples.

The majority of excluded studies were excluded because of the latter criterion. In total, 15 studies were included in our analysis for the sex breakdown among infertile couples. Infertility among couples was reported as due to one of the following causes: male factor, female factor, both, or unknown. Couples with infertility due to both partners were allocated to both male factor and female factor, and couples with infertility of unknown cause were allocated to male and female factors based on the proportion observed in other couples in the study. We estimated the proportion of couples' infertility due to male factors and female factors separately in DisMod-MR 2.1. The quantity modelled was the proportion of couples' infertility due to each sex for each of primary and secondary infertility. The table below shows the dataset contents for these four models, each of which used the same set of sources.

| Proportion sex-specific primary and secondary infertility      | Proportion |
|----------------------------------------------------------------|------------|
| Site-years (total)                                             | 19         |
| Number of countries with data                                  | 15         |
| Number of GBD regions with data (out of 21 regions)            | 8          |
| Number of GBD super-regions with data (out of 7 super-regions) | 6          |

### Modelling strategy

For GBD 2017, we estimated the prevalence of primary and secondary infertility by sex and cause in three steps: 1) estimation of couples infertility [four DisMod-MR 2.1 models], 2) estimation of infertility by sex [four



DisMod-MR 2.1 models], and 3) causal attribution of infertility. We assumed zero infertility prior to age 15 or after age 50 years as fertility is not expected to be desired outside these age ranges in women; an assumption that was therefore carried over to men as well. All DisMod-MR 2.1 models were run as single parameter models. No study or country covariates were used in any models.

### Estimation of couples' infertility

To estimate the prevalence of primary and secondary infertility among couples, we first run four DisModMR 2.1 models to estimate the four parameters detailed above, prevalence of primary infertility (1), prevalence of primary infertility exposure (2), prevalence of secondary infertility (3), and prevalence of secondary infertility exposure (4). For prevalence of infertility (models 1 and 3), we tried using the natural log of the age-standardised death rate (lnASDR) of sexually transmitted infections (STIs), but it was not statistically significant so we did not use it in the final model. We did not use any study- or country-level covariates for these models. Next, we estimated primary and secondary couples' infertility from DisMod-covariates for these models. Next, we estimated primary and secondary couples' infertility from DisMod-MR 2.1 models by multiplying the estimates for prevalence of infertility among exposed women by the prevalence of exposure to infertility to obtain prevalence of infertility among all women and all men.

### Estimation of infertility by sex

After running the four models estimating overall infertility, described above, we ran four DisMod-MR 2.1 models to estimate the proportion of primary and secondary infertility by sex, proportion of primary female infertility, proportion of secondary female infertility, proportion of primary male infertility, and proportion of secondary male infertility. We model sex-specific infertility as a proportion. Because infertility in some couples is attributable to both partners rather than just one, the sum of the proportions due to each partner is greater than one when both partners are infertile. When the sum of the proportions is lower than one, we scale it to be equal to one through custom code. Again, we tried using lnASDR of STIs as a covariate, but it was not statistically significant so we did not use it in the final model. We did not use any study- or country-level covariates for these models. We multiplied our prevalence of primary and secondary infertility derived in step 1 by the proportion due to male and female factors to estimate primary and secondary infertility by sex.

### Causal attribution

There are seven identified causes of female infertility in the GBD 2017 cause list: pelvic inflammatory disease (PID) due to chlamydia, PID due to gonorrhoea, PID due to other sexually transmitted diseases, maternal sepsis, polycystic ovarian syndrome, endometriosis, and Turner syndrome. For each of these diseases, we determined the prevalence of infertility by a literature review of the probability of becoming infertile due to that disease. For STIs, we applied a proportion with infertility derived from Westrom and colleagues<sup>1</sup> to incident cases of PID and used DisMod-MR 2.1 to calculate corresponding prevalence for each subsequent age group through the fertile years, assuming zero remission or excess mortality. For the others, we added all the disease-specific estimates of prevalence and assigned the remaining proportion to categories of “female primary infertility due to other causes” and “female secondary infertility due to other causes.” We assumed all infertility from Turner syndrome is primary infertility and all infertility following maternal sepsis is secondary infertility. The only recognized cause of male infertility in the GBD 2018 cause list is Klinefelter syndrome. We assigned all other male infertility to “male” infertility due to other causes.

### Sequelae/disability weights

Every person with infertility was assumed to experience the health state as determined from the GBD disability weights survey. The lay descriptions of primary and secondary are listed below.

| Health state name      | Health state description                                                                                                               | Disability weight  |
|------------------------|----------------------------------------------------------------------------------------------------------------------------------------|--------------------|
| Infertility, primary   | This person wants to have a child and has a fertile partner, but the couple cannot conceive.                                           | 0.008(0.003-0.015) |
| Infertility, secondary | This person has at least one child, and wants to have more children. The person has a fertile partner, but the couple cannot conceive. | 0.005(0.002-0.011) |

## ESTIMATION PROCESS FOR DALYS

### Computing DALYs

To estimate DALYs for GBD 2017, we started by estimating cause-specific mortality and non-fatal health

loss. For each year for which YLDs have been estimated (1990, 1995, 2000, 2007, 2010 and 2017), we compute DALYs by adding YLLs and YLDs for each age-sex-location. Uncertainty in YLLs was assumed to be independent of uncertainty in YLDs. We calculated 1,000 draws for DALYs by summing the first draw of the 1000 draws for YLLs and YLDs and then repeating for each subsequent draw. 95% uncertainty intervals

(UI) were computed using the 25th and 975th ordered draw of the DALY uncertainty distribution. Please refer to the appendices of the GBD 2017 non-fatal capstone and cause of death capstone publications for information on how YLLs and YLDs were computed. We calculate DALYs as the sum of YLLs and YLDs for each cause, location, age group, sex, and year.
